# Supplementary material for: Design of two-dimensional electron gas systems via polarization discontinuity from large-scale first-principles calculations
Source: Royal Society of Chemistry journal article supplement (doi:10.1039/c8tc01893f), 2018-01-01
Supplement: c8tc01893f1.pdf [file c8tc01893f1.pdf]

## Supporting Information

### **Design Two-Dimensional Electron Gas via Polarization Discontinuity from Large-Scale First-Principles Calculations**

Jianli Cheng and Kesong Yang\*

*Department of NanoEngineering, University of California San Diego, 9500 Gilman Drive,  
La Jolla, California, 92093-0448, United States*

\*E-mail: [kesong@ucsd.edu](mailto:kesong@ucsd.edu). Tel: +1-858-534-2514.

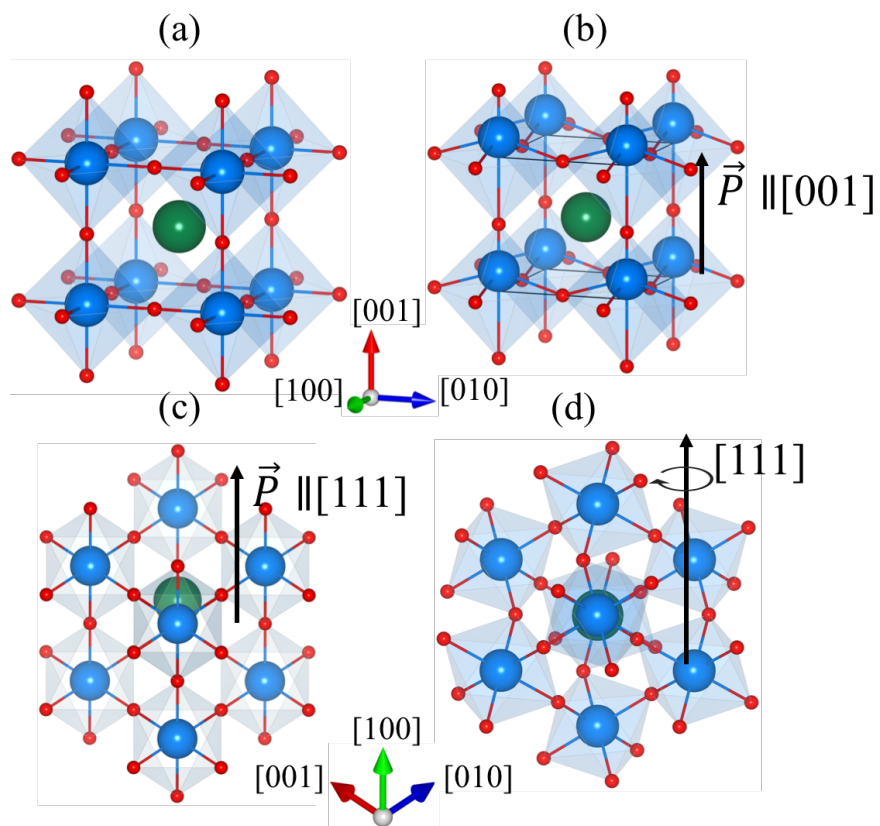

**Figure S1.** Scheme of perovskite oxide  $ABO_3$  structures: (a) cubic, (b) tetragonal, (c) rhombohedral, and (d) structure with oxygen octahedral rotates along the  $[111]$  direction.

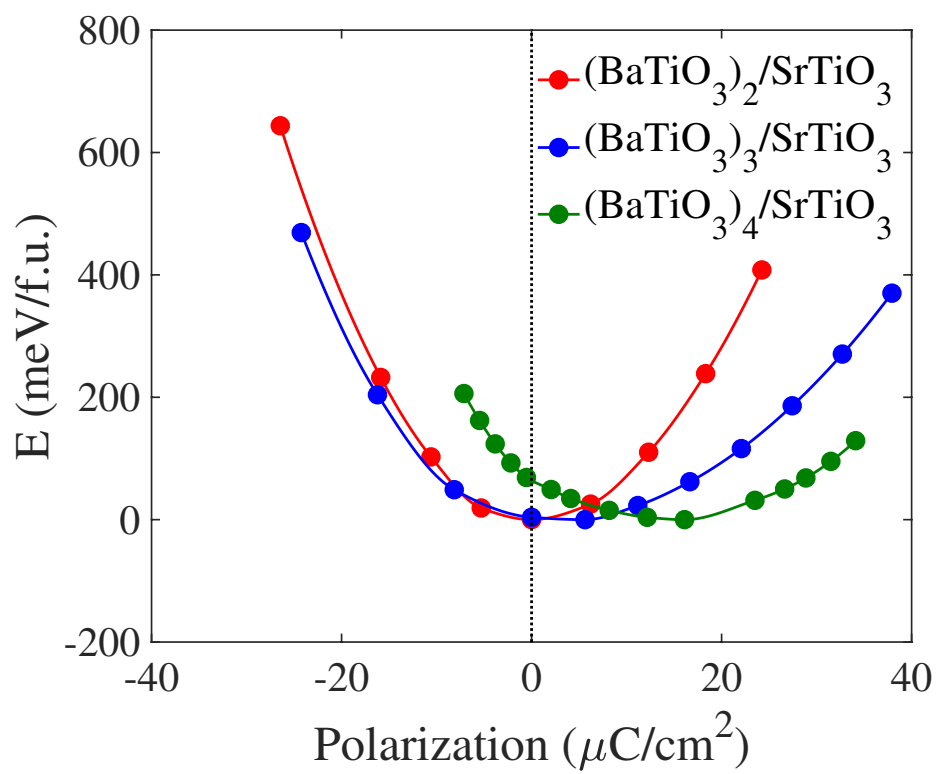

**Figure S2.** Calculated total energy per unit cell of the film as a function of the average polarization for BaTiO<sub>3</sub>/SrTiO<sub>3</sub> heterostructure (HS) models with different film thickness. The reference energy (zero) is taken from the lowest energy of each system.

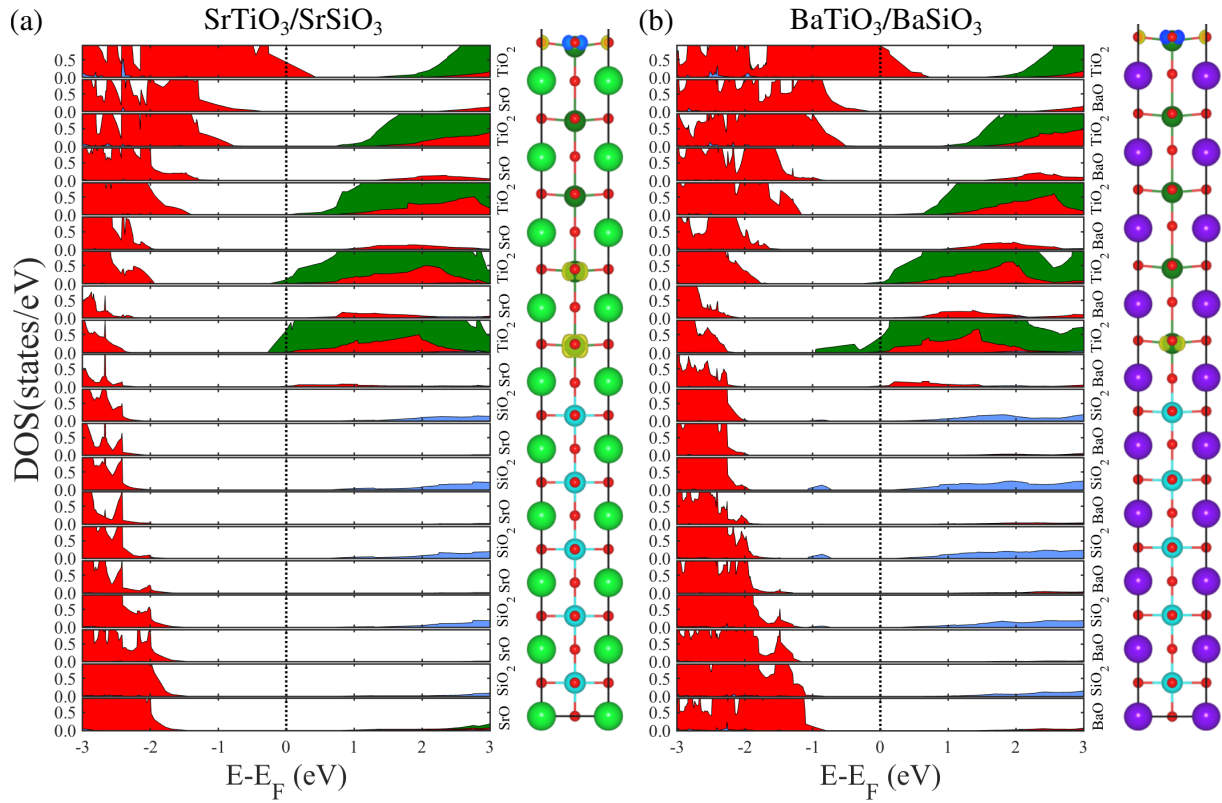

**Figure S3.** Calculated layer-resolved partial DOS for (a) SrTiO<sub>3</sub>/SrSiO<sub>3</sub> and (b) BaTiO<sub>3</sub>/BaSiO<sub>3</sub>, along with their charge density plots projected on the bands forming the metallic states. The vertical dash line at zero-point energy shows the Fermi level. The solid blue, red, and green color indicates *s*, *p*, and *d* orbital, respectively.

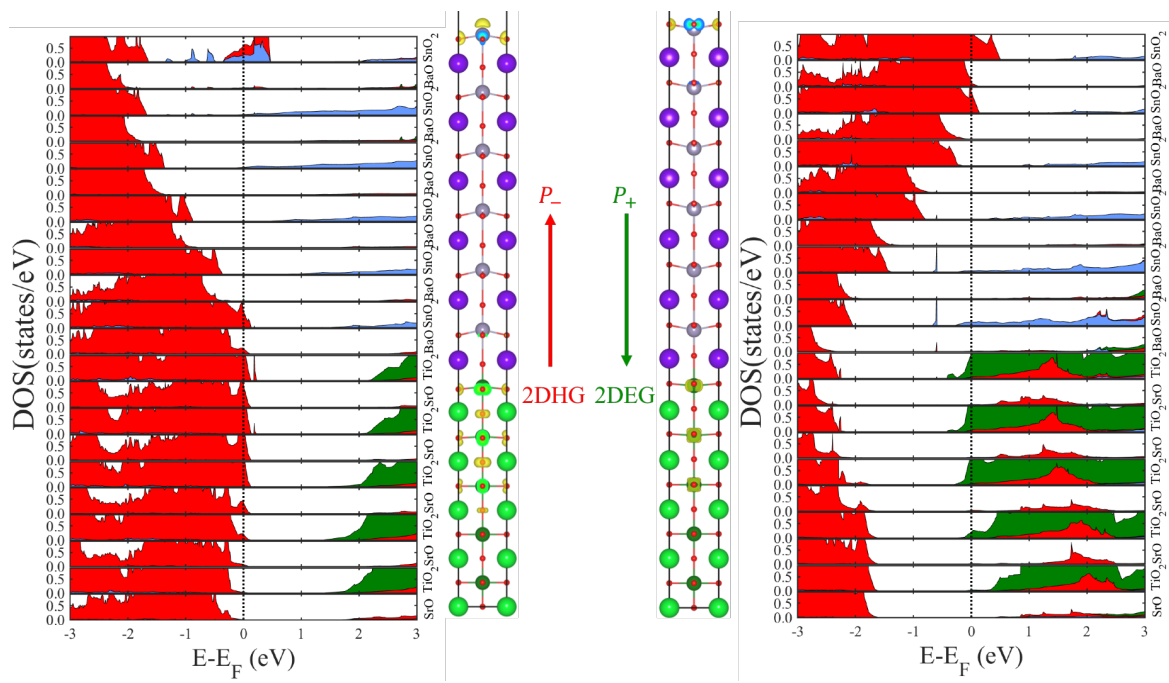

**Figure S4.** Calculated layer-resolved partial DOS for  $P_+$  and  $P_-$  states in  $\text{BaSnO}_3/\text{SrTiO}_3$  HS, along with their charge density plots projected on the bands forming the metallic states.

**Table S1.** Calculated electron effective mass  $m^*$  (in unit of free electron mass) along the M- $\Gamma$  and  $\Gamma$ -X path for BaTiO<sub>3</sub>/SrTiO<sub>3</sub>, CaZrO<sub>3</sub>/YbZrO<sub>3</sub>, CaZrO<sub>3</sub>/CaHfO<sub>3</sub>, CaSnO<sub>3</sub>/BaSiO<sub>3</sub>, BaSiO<sub>3</sub>/CaGeO<sub>3</sub>, and CaZrO<sub>3</sub>/SrSnO<sub>3</sub> HS models.

| Systems                                | $m^*/m_e$   |             |         |
|----------------------------------------|-------------|-------------|---------|
|                                        | M- $\Gamma$ | $\Gamma$ -X | Average |
| BaTiO <sub>3</sub> /SrTiO <sub>3</sub> | 0.56        | 0.46        | 0.51    |
| CaZrO <sub>3</sub> /YbZrO <sub>3</sub> | 0.40        | 0.38        | 0.39    |
| CaZrO <sub>3</sub> /CaHfO <sub>3</sub> | 0.51        | 0.40        | 0.46    |
| CaSnO <sub>3</sub> /BaSiO <sub>3</sub> | 0.34        | 0.31        | 0.33    |
| BaSiO <sub>3</sub> /CaGeO <sub>3</sub> | 0.30        | 0.24        | 0.27    |
| CaZrO <sub>3</sub> /SrSnO <sub>3</sub> | 0.34        | 0.28        | 0.31    |
